# Supplementary material
Source: publisher figshare collection journal article supplement (https://diabetesjournals.figshare.com/articles/dataset/_/20173055)
Supplement: Supplementary file 1 [file 1]

**Supplemental Table 1. Oligonucleotide sequences used in this manuscript.**

|       |               |                               |
|-------|---------------|-------------------------------|
| Q-PCR | Cyclophilin_F | GGTGGAGAGCACCAAGACAGA         |
| Q-PCR | Cyclophilin_R | GCCGGAAGTCGACAATGATG          |
| Q-PCR | Aifm2_F       | TTGGTGACTGTGCCGATAC           |
| Q-PCR | Aifm2_R       | GATCTGACCCACGCCATCAT          |
| Q-PCR | Gpdh_F        | CGC ATC ACT GTG GTA CAA GAG G |
| Q-PCR | Gpdh_R        | CTT GGT GTT GTC ACC GAA GCC A |
| Q-PCR | Ldha_F        | ACG CAG ACA AGG AGC AGT GGA A |
| Q-PCR | Ldha_R        | ATG CTC TCA GCC AAG TCT GCC A |
| Q-PCR | Pfk_F         | CTG TTC GCT CTA CCG TGA GGA T |
| Q-PCR | Pfk_R         | TTG GAA CCA CCT TGA CCA GTC C |
| Q-PCR | Glut4_F       | GGTGTGGTCAATACGGTCTTCAC       |
| Q-PCR | Glut4_R       | AGCAGAGCCACGGTCATCAAGA        |
