# Supplementary material
Source: publisher figshare collection journal article supplement (https://diabetesjournals.figshare.com/articles/dataset/_/20173055)
Supplement: Supplementary file 2 [file 1]

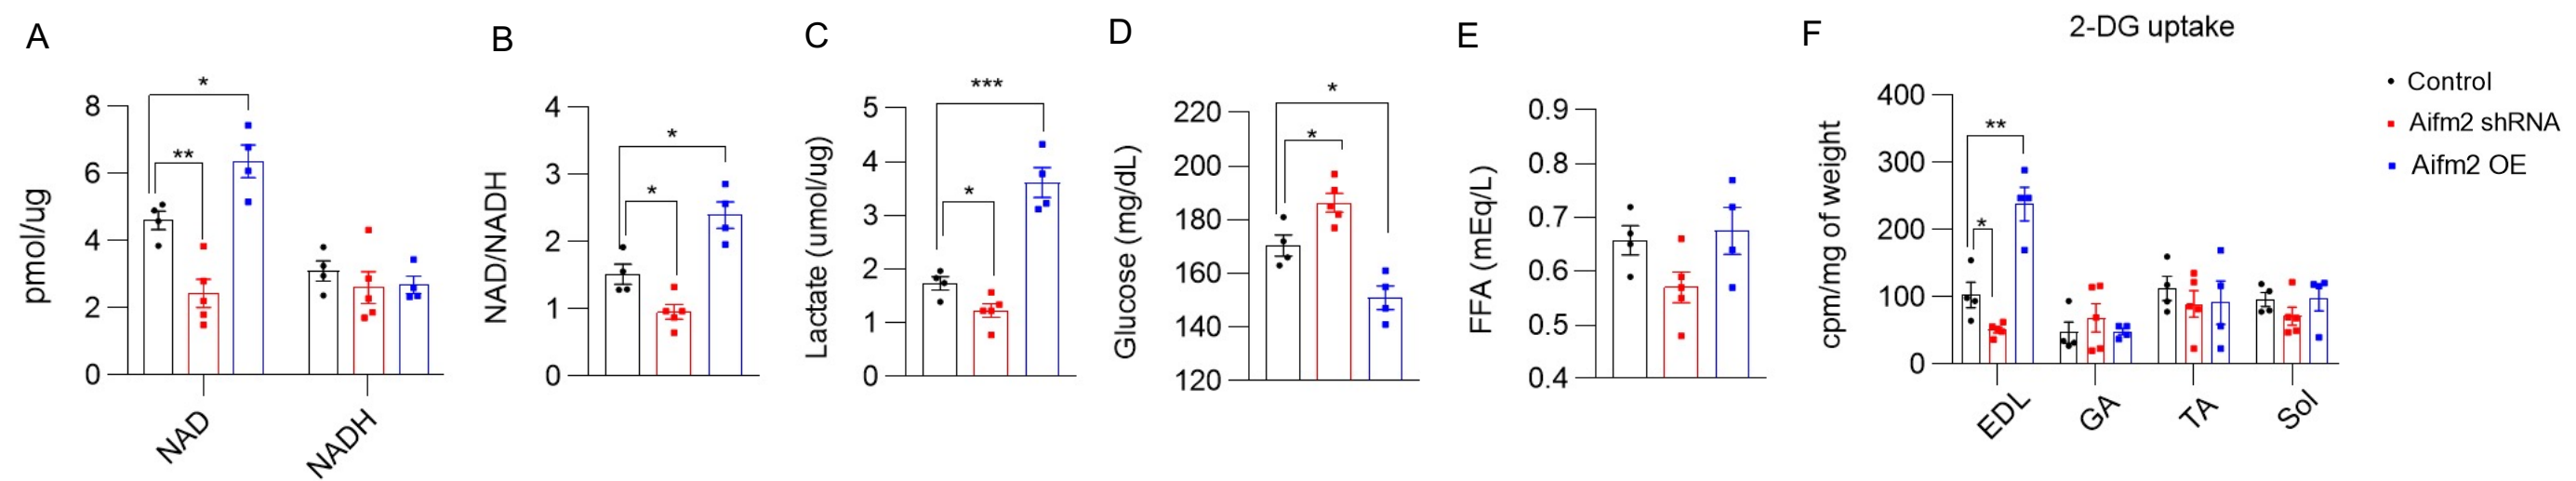

**Supplemental Figure 1. The altered glucose utilization in muscle-targeted *Aifm2* knockdown and overexpressing mice is still sustained under exercise regimens of equal duration.** The concentration of NAD<sup>+</sup>, NADH (A), NAD<sup>+</sup>/NADH ratio (B), lactate concentration (C), plasma glucose levels (D), plasma FFA levels (E) and <sup>3</sup>H-2-deoxyglucose uptake assay (F) of C57BL/6J mice transfected with shAifm2, AIFM2 or control after the same duration of high-intensity exercise ( $n = 4$  for control and AIFM2 groups,  $n = 5$  for shAifm2 group, means  $\pm$  SEM, \* $p < 0.05$ , \*\* $p < 0.001$ , \*\*\* $p < 0.0001$ , two-tailed Student's t-test).

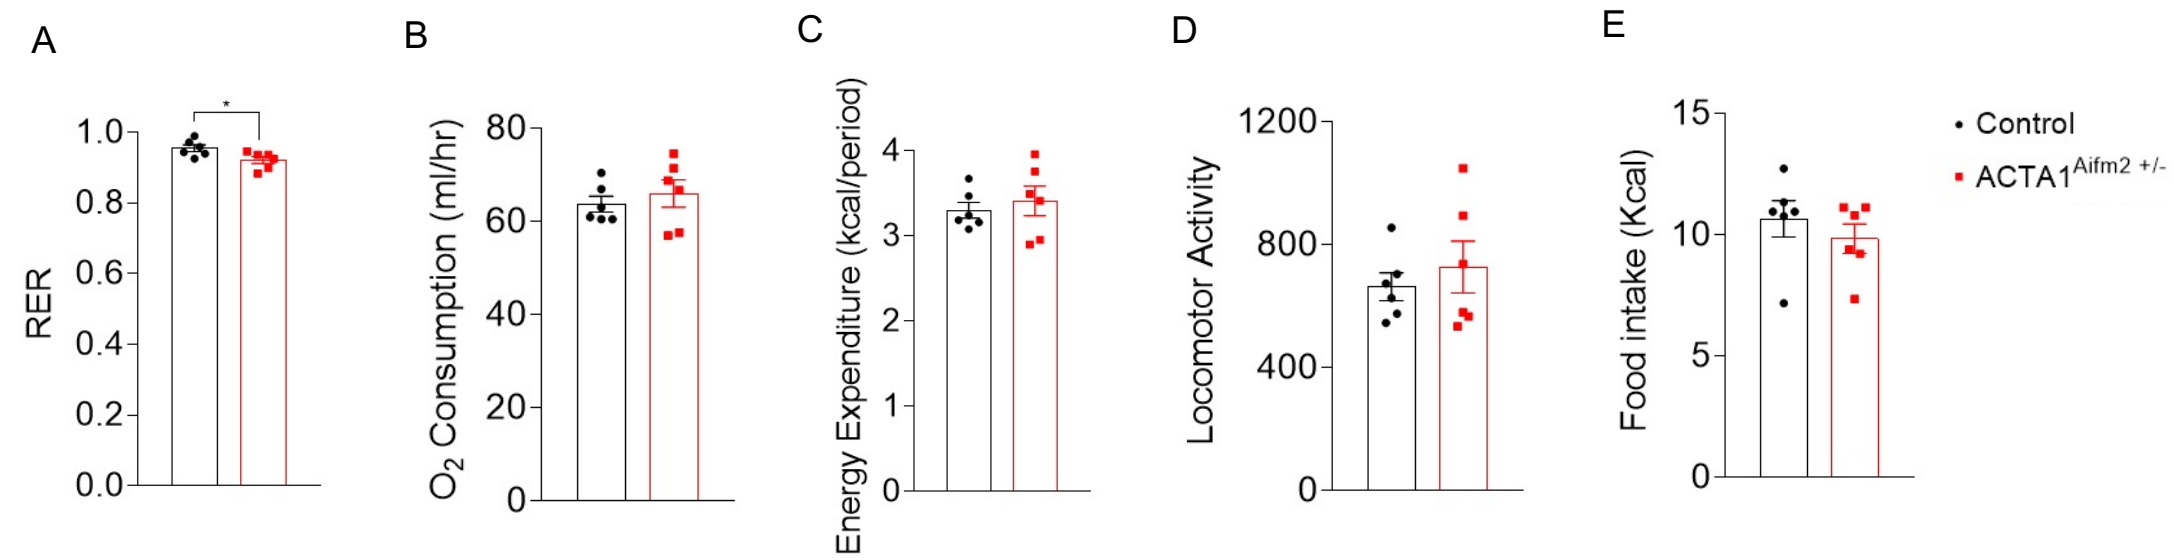

**Supplemental Figure 2. Muscle-specific *Aifm2* haploinsufficient mice shows a reduced RER at resting.** Control (*Aifm2*<sup>f/+</sup>) and *Aifm2* haploinsufficient mice (ACTA1<sup>Aifm2 +/-</sup>) at rest are placed on CLAMS. Shown is RER (A), oxygen consumption (B), energy expenditure (C), locomotor activity (D) and food intake of control and ACTA1<sup>Aifm2 +/-</sup> mice (*n* = 6, means ± SEM, \**p* < 0.05).
